# Supplementary material for: Improving the efficiency of precise genome editing with site-specific Cas9-oligonucleotide conjugates
Source: PubMed Central journal article supplement — Sci Adv. 2020 Apr 8;6(15):eaaz0051. doi: 10.1126/sciadv.aaz0051 (PMC7250679; doi:10.1126/sciadv.aaz0051), 2020-04-08
Supplement: aaz0051_SM.pdf [file aaz0051_SM.pdf]

## Supplementary Materials for

### **Improving the efficiency of precise genome editing with site-specific Cas9-oligonucleotide conjugates**

Xinyu Ling, Bingteng Xie, Xiaoqin Gao, Liying Chang, Wei Zheng, Heqi Chen, Yujia Huang, Linzhi Tan, Mo Li\*, Tao Liu\*

\*Corresponding author. Email: taoliupku@pku.edu.cn (T.L.); limo@hsc.pku.edu.cn (M.L.)

Published 8 April 2020, *Sci. Adv.* **6**, eaaz0051 (2020)  
DOI: 10.1126/sciadv.aaz0051

#### **This PDF file includes:**

Figs. S1 to S8  
Tables S1 and S2

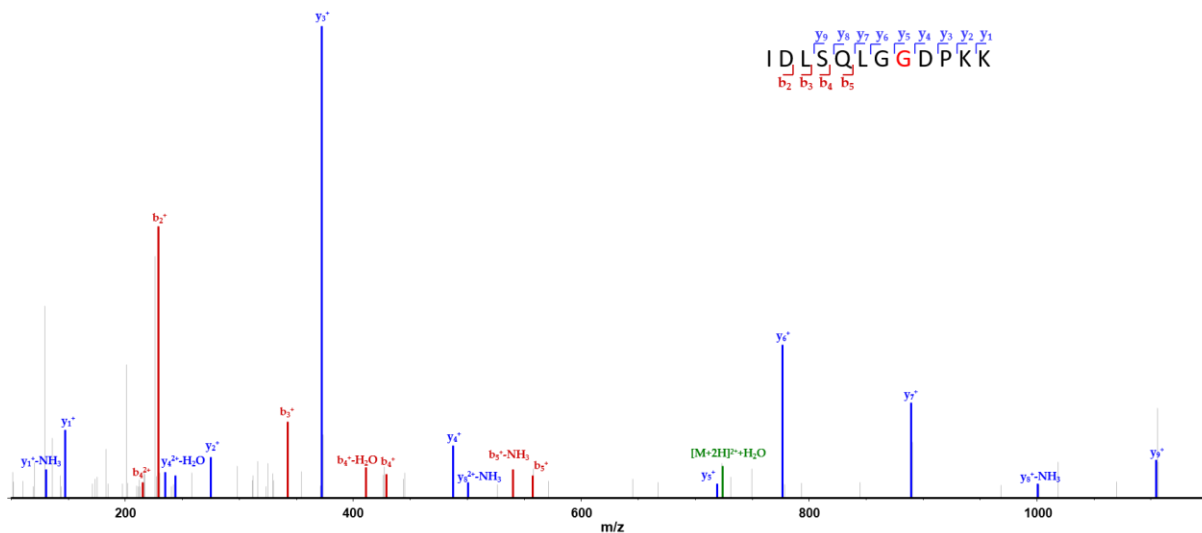

**Fig. S1. Peptide mass spec of G1367-AeF.**

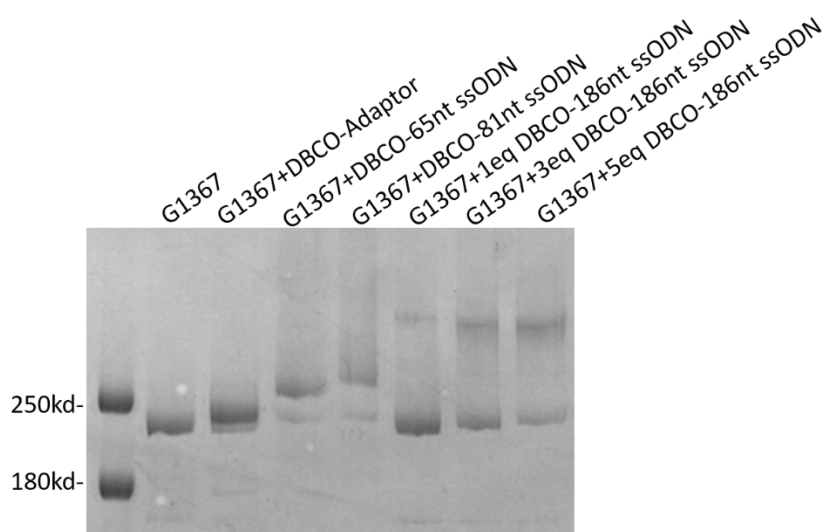

**Fig. S2. SDS-PAGE analysis the G1367 conjugate with different length DBCO modified ssODN at 1:1 stoichiometry.** DBCO-adaptor(25nt), DBCO-ssODN 65nt/81nt and DBCO-186nt were mixed with pre-assembled G1367AeF RNP (500ng) at the equivalent 3 hours at 4 degree and analysis by SDS-PAGE.

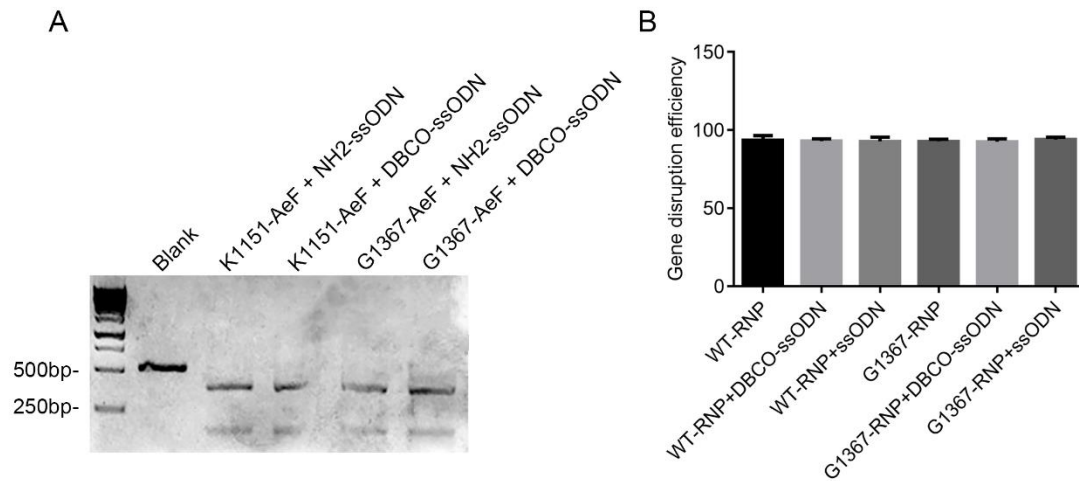

**Fig. S3. Gene disruption activity of Cas9-ssODN conjugate *in vitro* and *in cell*.** (a) Different Cas9 mutants were assembled into RNPs and incubated with DBCO or NH<sub>2</sub> modified ssODN. The resulting complex were measured for cleavage activity *in vitro*, and the cleavage products were measured on a 1% agarose. (b) Cas9 G1367-AeF mutant and wt Cas9 were assembled into RNP with DBCO or NH<sub>2</sub> modified ssODN, the complex was delivered in HEK293 EGFP Teton cell through electroporation and analyzed by Flow cytometry 48h post-transduction.

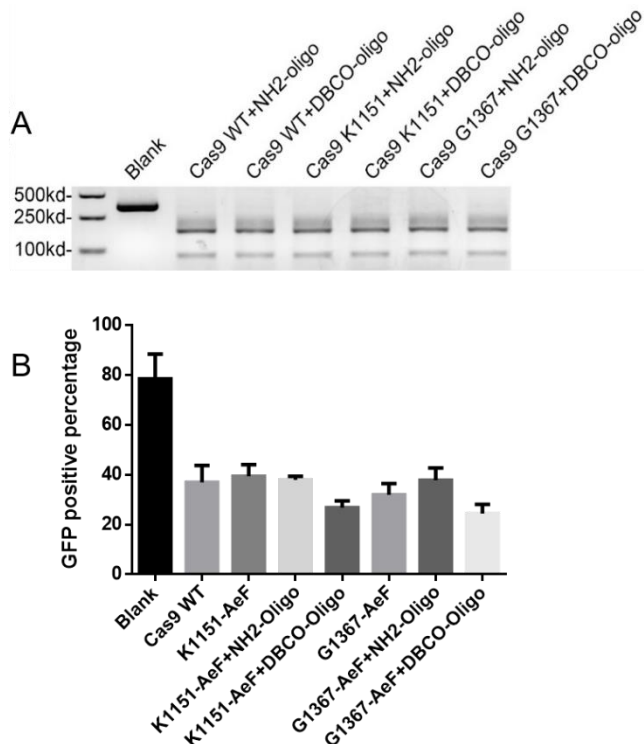

**Fig. S4. Cleavage activity of Cas9 mutants reacted with modified oligos *in vitro* and *in cell*.** (A) RNPs were pre-incubated with NH<sub>2</sub> or DBCO modified oligo DNA, forming RNP-oligo DNA complex and analyzed for cleavage activity on agarose gel. (B) RNP with adaptor conjugated at different sites were transfected into HEK293-Teton-EGFP by RNAiMAX and

analyzed by flow cytometry 2 days post-transduction. Error bars represent the standard deviation of triplicates.

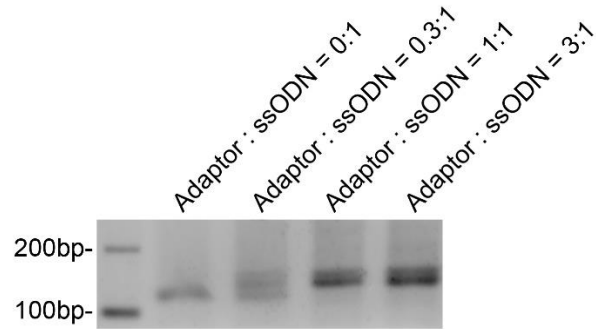

**Fig. S5. Oligonucleotide-adaptor paired with ssODN.** Oligonucleotide-adaptor was mixed with ssODN at different molar ratio in vitro, and analyzed on a 2% agarose gel.

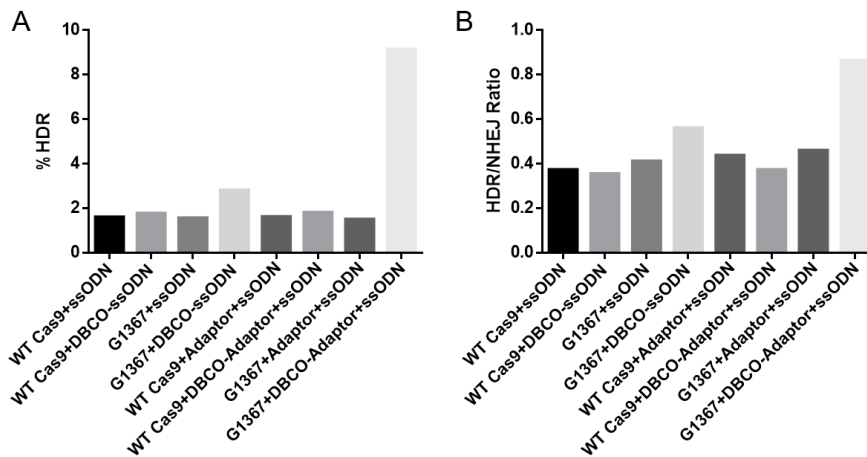

**Fig. S6. Deep sequencing confirmation of HiBiT insertion and HDR enhancement.**

(A) Absolute HDR efficiency was quantified by deep sequencing. (B) HDR/NHEJ ratio was calculated based on data from deep sequencing.

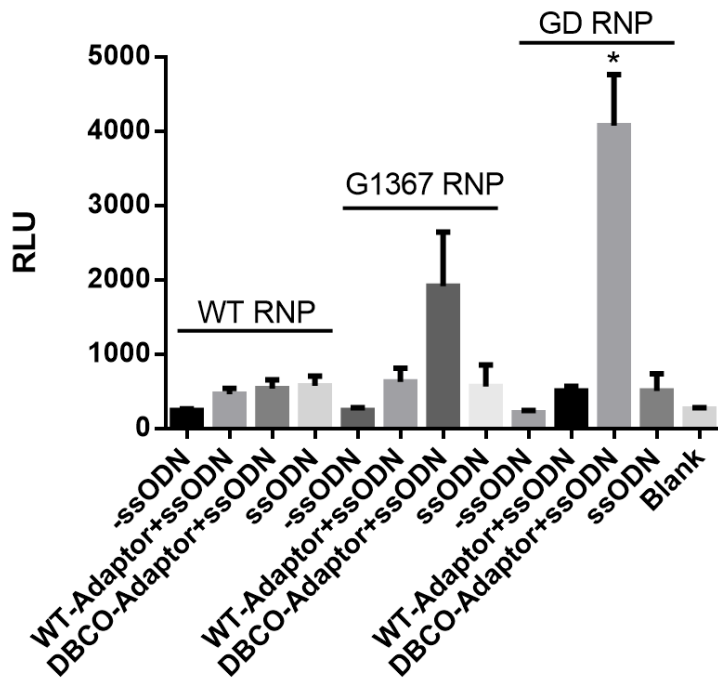

**Fig. S7. The HDR efficiency of RNP-dual ssODN complexes.** RNP with adaptor conjugated at different sites were transfected into HEK293 by RNAiMAX and analyzed by Hibit assay 2 days post-transduction. Error bars represent the standard deviation of triplicates. Significance was calculated by means of a 2-tailed Student's *t*-test; \*  $P < 0.05$ .

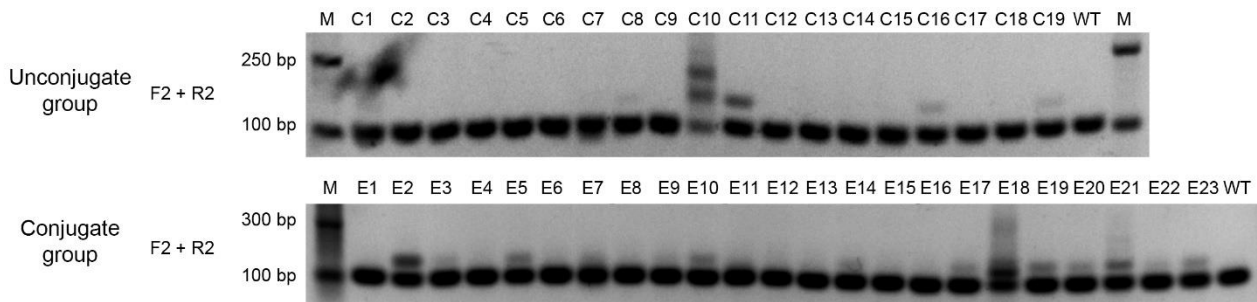

**Fig. S8. Genotyping PCR of zygotes after RNP microinjection.** A 141 bp fragment containing a 42 bp V5 tag can be specifically detected in edited zygotes using primer F2 and R2, and 99 bp band was amplified both in edited and unedited zygotes.

**Table S1. Expression yield of Cas9 and its chemical mutants.**

| Mutation site | Expression yield      | Mutation site | Expression yield |
|---------------|-----------------------|---------------|------------------|
| WT            | 3mg/L                 | K929          | 0.2mg/L          |
| K3            | Degradation seriously | L1004         | 2.7mg/L          |
| D39           | Inclusion body        | K1151         | 2.8mg/L          |
| H41           | 0.25mg/L              | K1153         | 1.5mg/L          |
| H754          | 0.17mg/L              | G1361         | 0.8mg/L          |
| L833          | Low expression        | G1367         | 3mg/L            |

**Table S2. Primer and donor sequence used in the study  
a. Primers used for mutagenesis PCR**

| Name        | Sequence                                                       |
|-------------|----------------------------------------------------------------|
| K3TAG-FW    | CCAAGAAGAAGAGGAAGGTGATGGATtAGAAATACTC<br>AATAGGCTTAGATATCGGCAC |
| K3TAG-RV    | GTGCCGATATCTAAGCCTATTGAGTATTTCTaATCCATC<br>ACCTTCCTCTTCTTCTTGG |
| D39TAG-FW   | GTTCAAGGTTCTGGGAAATACATAGCGCCACAGTATCA<br>AAAAAAATC            |
| D39TAG-RV   | GATTTTTTTTGATACTGTGGCGCTATGTATTTCCAGAA<br>CCTTGAAC             |
| H41TAG-FW   | GTTCTGGGAAATACAGACCGCTAGAGTATCAAAAAAA<br>ATCTTATAGGGGCTC       |
| H41TAG-RV   | GAGCCCCTATAAGATTTTTTTTGATACTCTAGCGGTCT<br>GTATTTCCAGAAC        |
| H754TAG-FW  | GAATTGGTCAAAGTAATGGGGCGGTAGAAGCCAGAAA<br>ATATCGTTATTGAAATGGC   |
| H754TAG-RV  | GCCATTTCAATAACGATATTTTCTGGCTTCTACCGCCCC<br>ATTACTTTGACCAATTC   |
| L833TAG-F   | AGAATTAGATATTAATCGTTAGAGTGATTATGATGTGC<br>ATC                  |
| L833TAG-R   | GATCGACATCATAATCACTCTAACGATTAATATCTAAT<br>TCT                  |
| K929TAG-F   | GTTGAAACTCGCCAAATCACTTAGCATGTGGCACAAT<br>TTTG                  |
| K929TAG-R   | CAAATTTGTGCCACATGCTAAGTGATTTGGCGAGTTT<br>CAAC                  |
| L1004TAG-F  | CTGCTTTGATTAAGAAATATCCAAAATAGGAATCGGA<br>GTTTGTCTATGGTG        |
| L1004TAG-R  | CACCATAGACAAACTCCGATTCCTATTTTGGATATTTT<br>TTAATCAAAGCAG        |
| K1151TAG-F  | CTAGTGGTTGCTAAGGTGGAATAGGGGAAATCGAAGA<br>AGTTAAA               |
| K1151TAG-R  | TTTAACTTCTTCGATTTCCCTATTCCACCTTAGCAACC<br>ACTAG                |
| K1153TAG-FW | GTTGCTAAGGTGGAAAAAGGGTAGTCAAGAAGTTAA<br>AATCCGTT               |

|             |                                                         |
|-------------|---------------------------------------------------------|
| K1153TAG-R  | AACGGATTTAACTTCTTCGACTACCCTTTTTCCACCTT<br>AGCAAC        |
| D1361TAG-F  | GTCTTTATGAAACACGCATTTAGTTGAGTCAGCTAGGA<br>GGTGA         |
| D1361TAG-R  | TCACCTCCTAGCTGACTCAACTAAATGCGTGTTTCATA<br>AAGAC         |
| G1367TAG-FW | CGCATTGATTTGAGTCAGCTAGGATAGGACCCCAAGA<br>AGAAGAGGAAGGTG |
| G1367TAG-RV | CACCTTCTTCTTCTTGGGGTCCTATCCTAGCTGACT<br>CAAATCAATGCG    |

**b. Primers used for V5 genotype verification**

| Name | Sequence                  |
|------|---------------------------|
| F1   | ACATGGGCAAGCCCATCC        |
| R1   | GCGTTAATTTGGATGGGATTGGTGG |
| F2   | GGCCATTAACGGCACACTG       |
| R2   | CCTCCAATTCCTTGTATCTC      |

**c. Primers used for deep sequencing**

| Name  | Sequence               |
|-------|------------------------|
| CX-FW | GAATTTGGCTACAGCAACAGGG |
| CX-RV | GGTCTCTCTTCTCCTTGTGC   |

**d. ssODN sequences and fragments used for ligation**

| Name                 | Sequence                                                                                                                                                                                                      |
|----------------------|---------------------------------------------------------------------------------------------------------------------------------------------------------------------------------------------------------------|
| GAPDH-186nt<br>ssODN | TCTTCTAGGTATGACAACGAATTTGGCTACAGCAA<br>CAGGGTGGTGGACCTCATGGCCACATGGCCTCCA<br>AGGAGGTGAGCGGCTGGCGGCTGTTCAAGAAGATT<br>AGCTAAGACCCCTGGACCACCAGCCCCAGCAAGA<br>GCACAAGAGGAAGAGAGAGACCCTCACTGCTGGG<br>GAGTCCCTGCCAC |
| Sox2-162nt ssODN     | TACCAGAGCGGCCCGGTGCCCGGCACGGCCATTAA<br>CGGCACACTGCCCTGTTCGCACATGGGCAAGCCCA<br>TCCCCAACCCCTGCTGGGCCTGGACAGCACCTGA<br>GGGCTGGACTGCGAACTGGAGAAGGGGAGAGATT<br>TTCAAAGAGATACAAGGGAATTG                             |

**e. Sequences of gRNA**

| Name | Sequence             |
|------|----------------------|
| EGFP | GGGCGAGGAGCTGTTACCG  |
| SOX2 | TGCCCTGTTCGCACATGTGA |
